# Supplementary material for: Microwave assisted synthesis of CdSe nanocrystals for straightforward integration into composite photovoltaic devices
Source: Royal Society of Chemistry journal article supplement (doi:10.1039/b505891k), 2005-01-01
Supplement: b505891k.pdf [file b505891k.pdf]

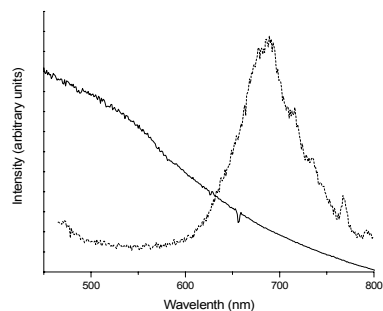

Figure S1: Extended absorption (—) and photoluminescence (---) spectra of representative larger CdSe nanocrystals in cyclohexanone.

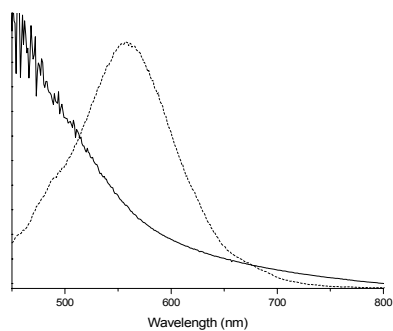

Figure S2: Extended absorption (—) and photoluminescence (---) spectra of representative smaller CdSe nanocrystals in cyclohexanone.

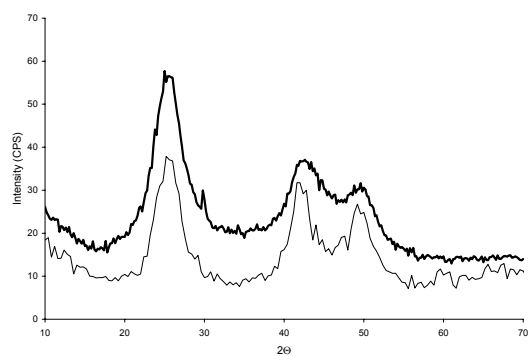

Figure S3. X-ray powder pattern of representative small (—) and larger (---) CdSe nanocrystals
